# Supplementary material
Source: publisher figshare collection journal article supplement (https://gsajournals.figshare.com/ndownloader/files/15511973)
Supplement: Supplementary file 1 [file 15511973]

**Supporting Table 2: Statistical analysis of semi-quantitative renal scoring**

| **Strain** | **Treatment** | **Sex** | **Time** | **Sex X Trt** | **Trt X timepoint** |
| --- | --- | --- | --- | --- | --- |
| CC 01 | 0.051(0.033) | -0.061(0.027) | 0.013(0.027) | 0.114(0.038) * | **0.023(0.038)** |
| CC 10 | 0.003(0.029) | 0.025(0.024) | -0.002(0.025) | **0.057(0.033)** | 0.063(0.034) |
| CC 11 | **0.073(0.015) ***** | 0(0.012) | 0.01(0.012) | -0.009(0.017) | -0.039(0.017) |
| CC 19 | **0.096(0.03) *** | -0.059(0.024) | 0.048(0.024) | 0.009(0.033) | **-0.01(0.034)** |
| CC 32 | -**0.013(0.044)** | 0.046(0.036) | **0.1(0.036)** | 0.021(0.05) | -0.074(0.05) |
| CC 37 | - 0.003 (0.028) | -0.006(0.019) | -0.001(0.019) | **0.073(0.026) *** | 0(0.026) |
| CC 40 | **0.089(0.018) ***** | -0.005(0.015) | -0.005(0.015) | 0.067(0.024) * | -0.031(0.028) |
| CC 41 | 0.02(0.02) | -0.014(0.019) | -0.004(0.019) | **0.045(0.025)** | **-0.013(0.025)** |
| CC 42 | **0.015(0.019)** | -0.038(0.014) * | 0.007(0.014) | 0.073(0.021) ** | **-0.001(0.021)** |
| CC 51 | **0.023(0.027)** | -0.001(0.022) | 0.001(0.022) | 0.076(0.031) | 0.082(0.031)* |

Linear model examining main effects (sex, treatment;Trt and time) and two additional treatment interactions (with sex and time). All values are given as estimates (standard error). Benjamini-Hochberg adjusted p-values are indicated as asterisks. Strains in which significant p values were obtained by application of the same model to cardiac scores are shown in bold font.

* p< 0.05

** p< 0.01

*** p< 0.001

CC040† : all but two animals in the chronic group died prematurely.
